# Supplementary material for: Population-Based Resequencing of Experimentally Evolved Populations Reveals the Genetic Basis of Body Size Variation in Drosophila melanogaster
Source: PLOS journal article supplement (doi:10.1371/journal.pgen.1001336), 2011-03-17
Supplement: S12 (10.1371/journal.pgen.1001336.s012) [file journal.pgen.1001336.s012]

**Table S3. False discovery rates for each allele frequency class at various thresholds for the X chromosome.**

| minStat cuto | Starting allele frequency |       |       |       |       |       |       |       |       |       |
|--------------|---------------------------|-------|-------|-------|-------|-------|-------|-------|-------|-------|
|              | 0.50                      | 0.45  | 0.40  | 0.35  | 0.30  | 0.25  | 0.20  | 0.15  | 0.10  | 0.05  |
| >.05         | 0.944                     | 0.966 | 0.967 | 0.960 | 0.953 | 0.970 | 0.900 | 0.799 | 0.631 | 0.459 |
| >.10         | 0.945                     | 0.959 | 0.966 | 0.969 | 0.967 | 1.008 | 0.992 | 1.007 | 1.044 | 1.059 |
| >.15         | 0.908                     | 0.923 | 0.927 | 0.936 | 0.928 | 0.976 | 0.955 | 1.001 | 1.130 | 1.075 |
| >.20         | 0.844                     | 0.867 | 0.875 | 0.888 | 0.880 | 0.917 | 0.895 | 0.927 | 1.067 | 0.945 |
| >.25         | 0.763                     | 0.793 | 0.807 | 0.806 | 0.793 | 0.840 | 0.803 | 0.810 | 0.904 | 0.716 |
| >.30         | 0.658                     | 0.700 | 0.719 | 0.709 | 0.683 | 0.721 | 0.684 | 0.648 | 0.683 | 0.501 |
| >.35         | 0.568                     | 0.620 | 0.624 | 0.602 | 0.579 | 0.606 | 0.546 | 0.520 | 0.490 | 0.329 |
| >.40         | 0.497                     | 0.557 | 0.549 | 0.501 | 0.488 | 0.523 | 0.444 | 0.408 | 0.363 | 0.210 |
| >.45         | 0.420                     | 0.471 | 0.463 | 0.402 | 0.378 | 0.403 | 0.337 | 0.289 | 0.241 | 0.125 |
| >.50         | 0.381                     | 0.433 | 0.418 | 0.345 | 0.309 | 0.336 | 0.259 | 0.229 | 0.178 | 0.087 |
| >.55         | 0.301                     | 0.337 | 0.324 | 0.264 | 0.226 | 0.225 | 0.167 | 0.148 | 0.091 | 0.039 |
| >.60         | 0.268                     | 0.281 | 0.264 | 0.206 | 0.175 | 0.176 | 0.127 | 0.106 | 0.059 | 0.025 |
| >.65         | 0.229                     | 0.223 | 0.217 | 0.154 | 0.121 | 0.134 | 0.082 | 0.070 | 0.033 | 0.013 |
| >.70         | 0.194                     | 0.179 | 0.172 | 0.128 | 0.091 | 0.095 | 0.052 | 0.048 | 0.016 | 0.006 |
| >.75         | 0.169                     | 0.150 | 0.132 | 0.113 | 0.080 | 0.063 | 0.039 | 0.034 | 0.008 | 0.001 |
| >.80         | 0.148                     | 0.126 | 0.106 | 0.080 | 0.062 | 0.035 | 0.030 | 0.023 | 0.006 | 0.000 |
| >.85         | 0.177                     | 0.115 | 0.103 | 0.072 | 0.033 | 0.019 | 0.014 | 0.004 | 0.002 | 0.000 |
| >.90         | 0.133                     | 0.120 | 0.074 | 0.057 | 0.024 | 0.012 | 0.009 | 0.004 | 0.000 | 0.000 |
| >.95         | 0.023                     | 0.016 | 0.007 | 0.039 | 0.009 | 0.000 | 0.007 | 0.000 | 0.000 | 0.000 |
