# Supplementary figures and images for: Population-Based Resequencing of Experimentally Evolved Populations Reveals the Genetic Basis of Body Size Variation in Drosophila melanogaster
Source: PLOS journal article supplement (doi:10.1371/journal.pgen.1001336), 2011-03-17

Chr. 2L


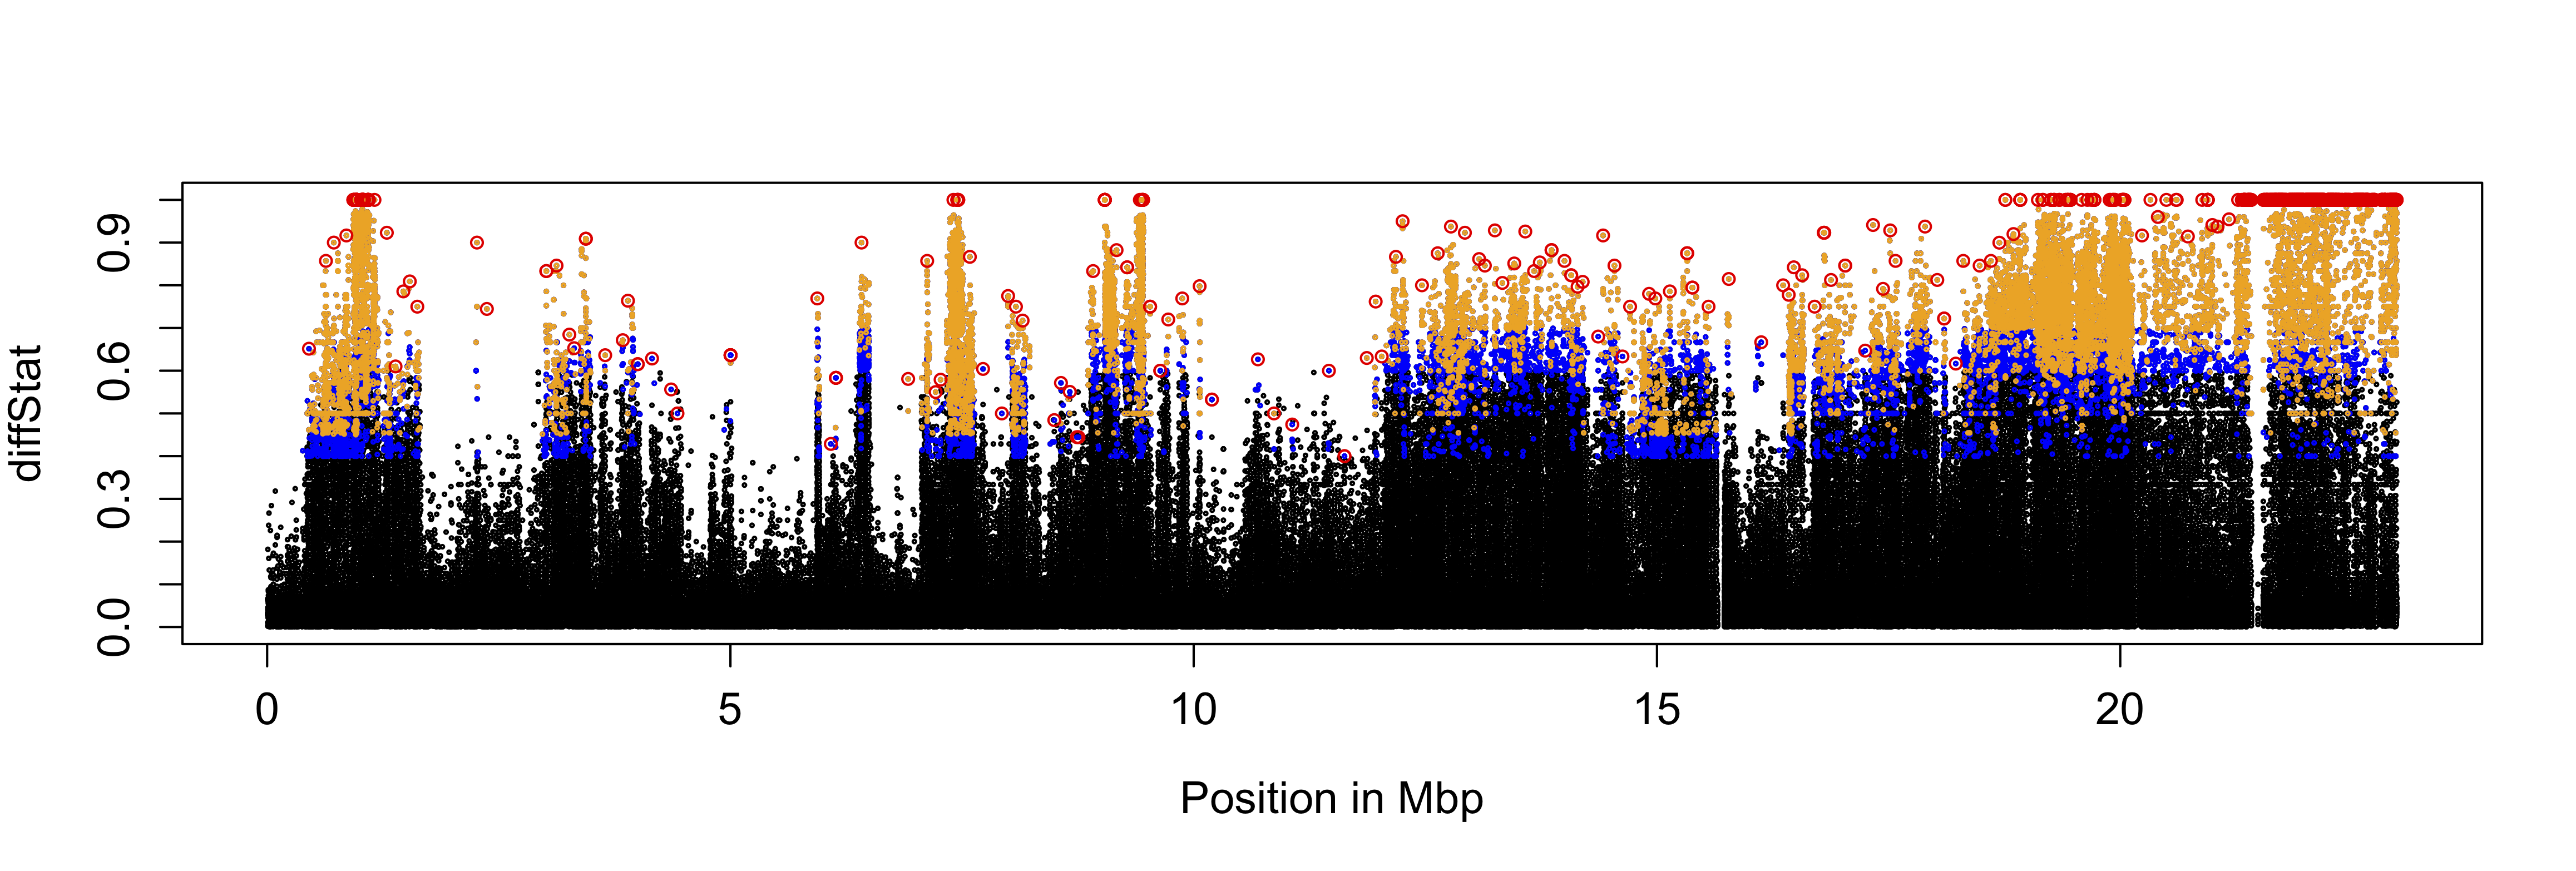


Chr. 2R


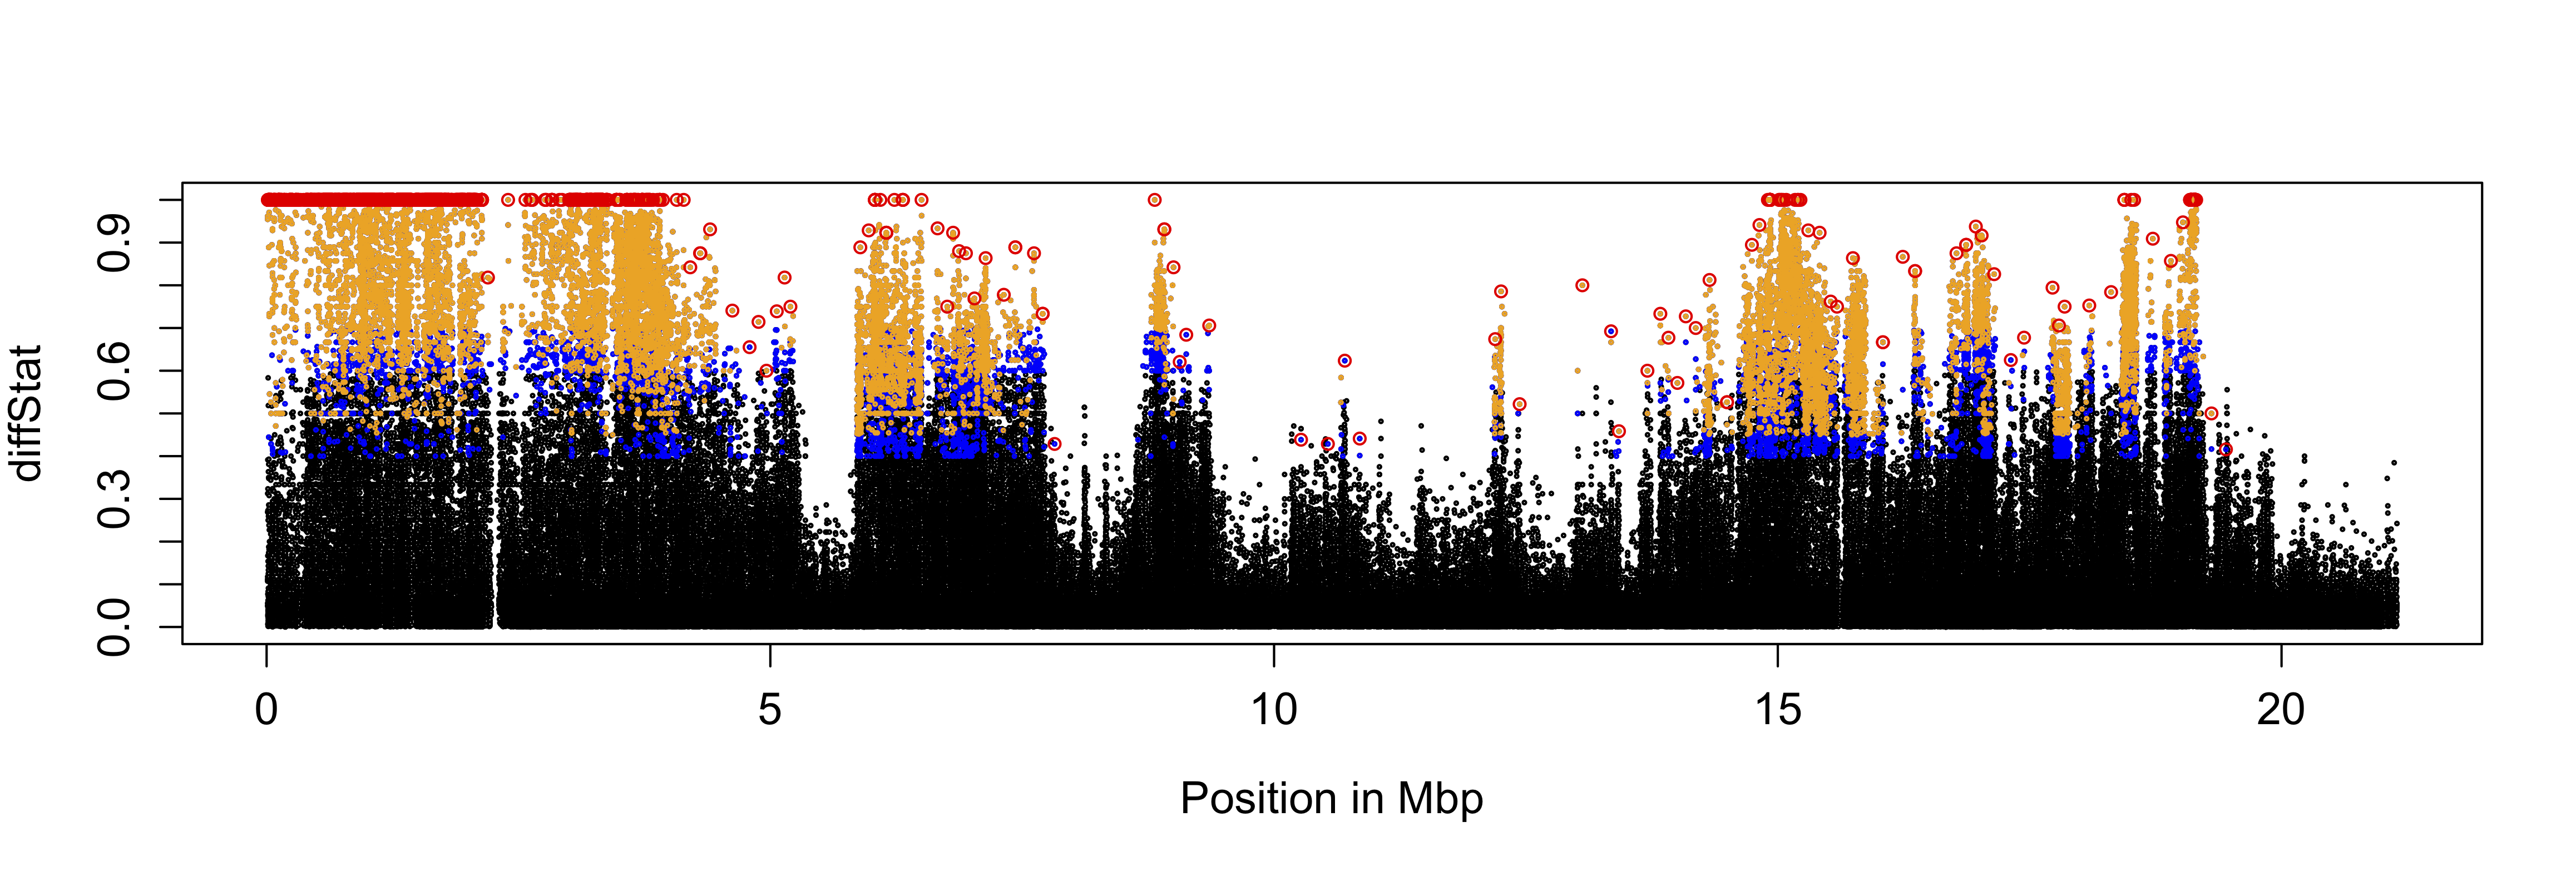


Chr. 3L


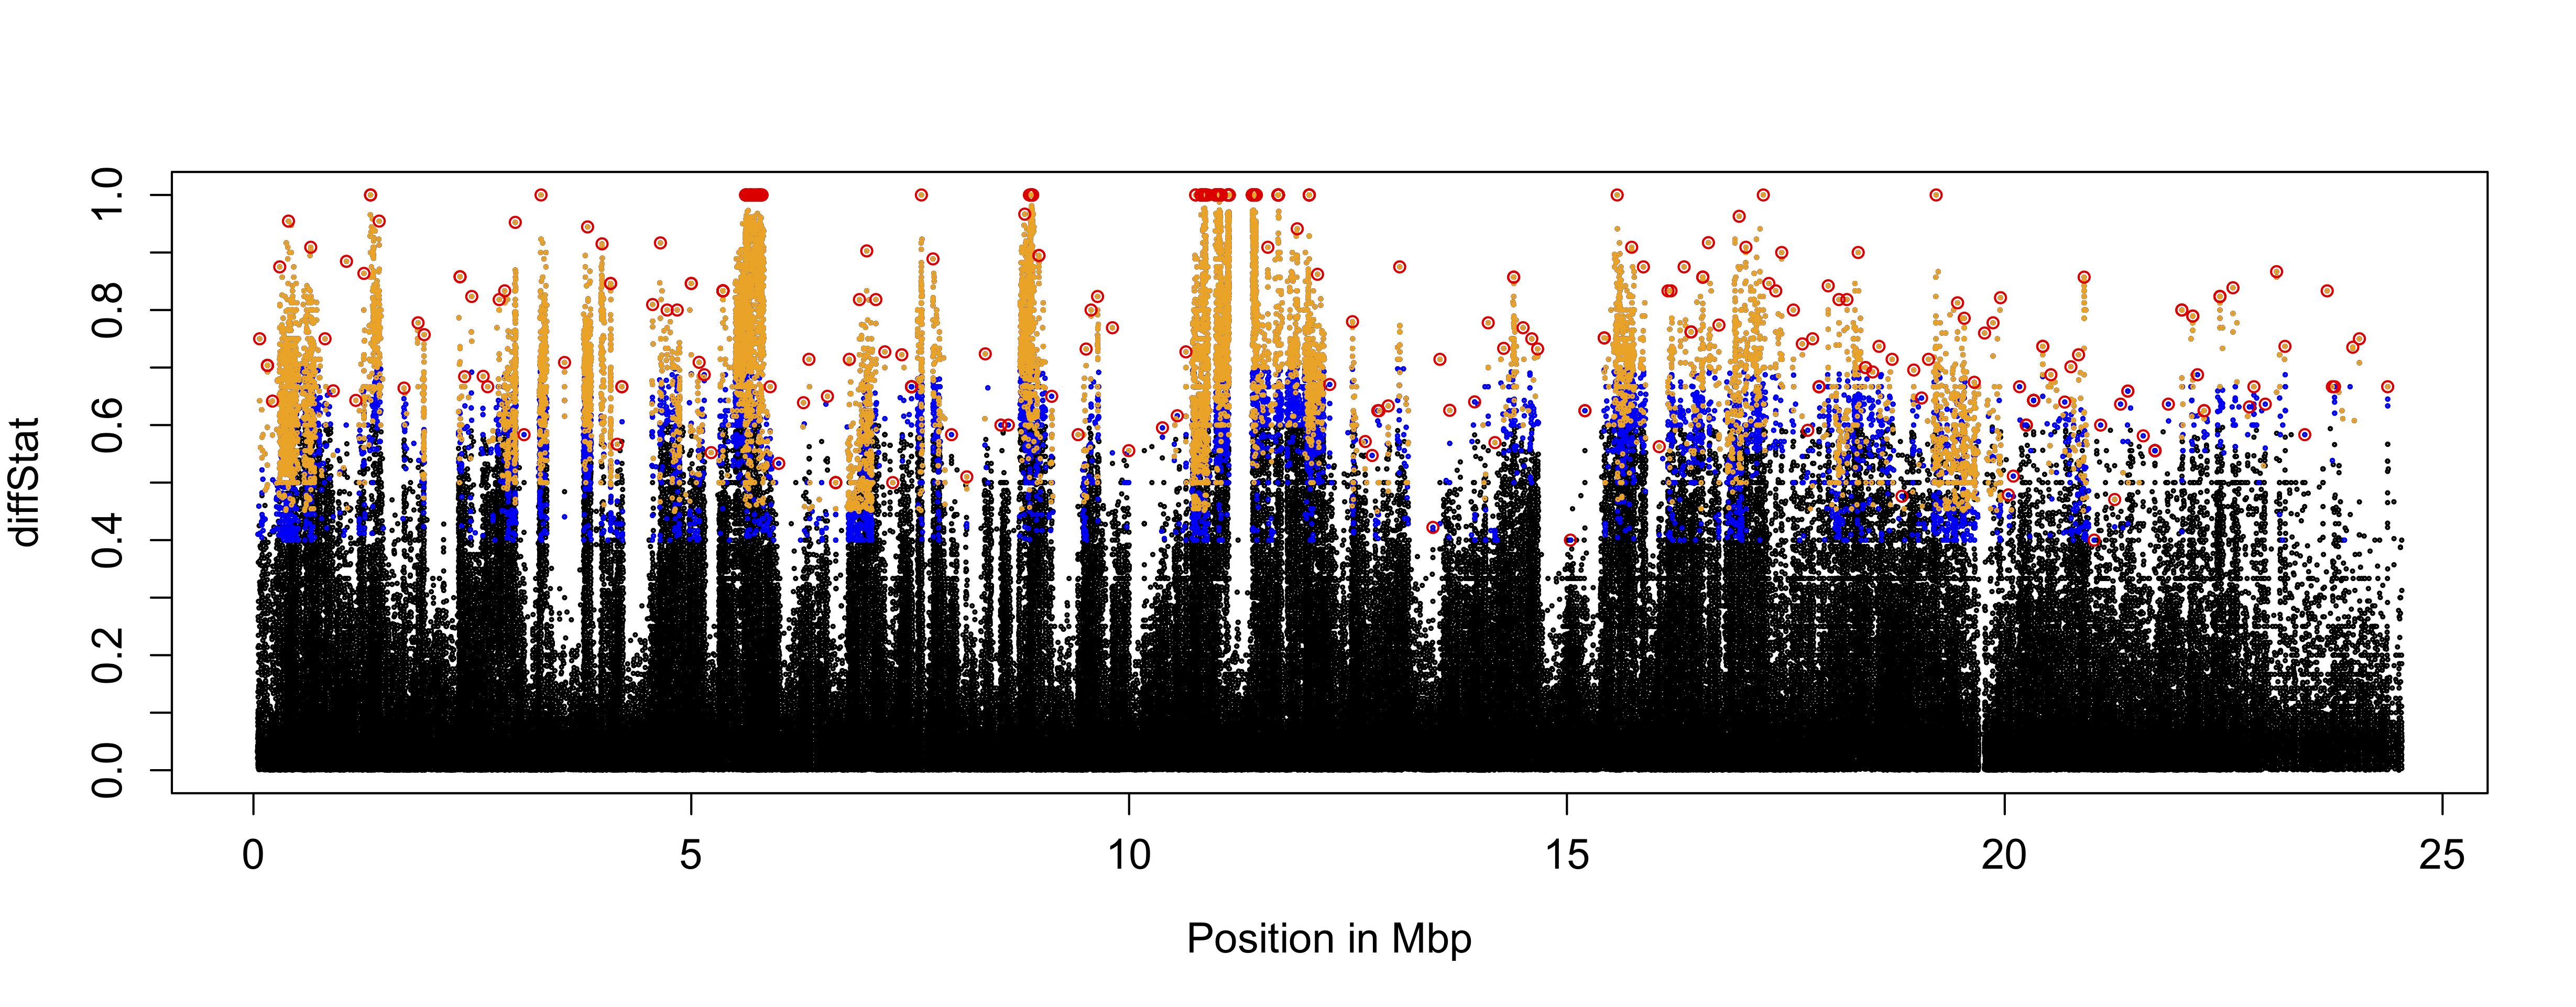


Chr. 3R


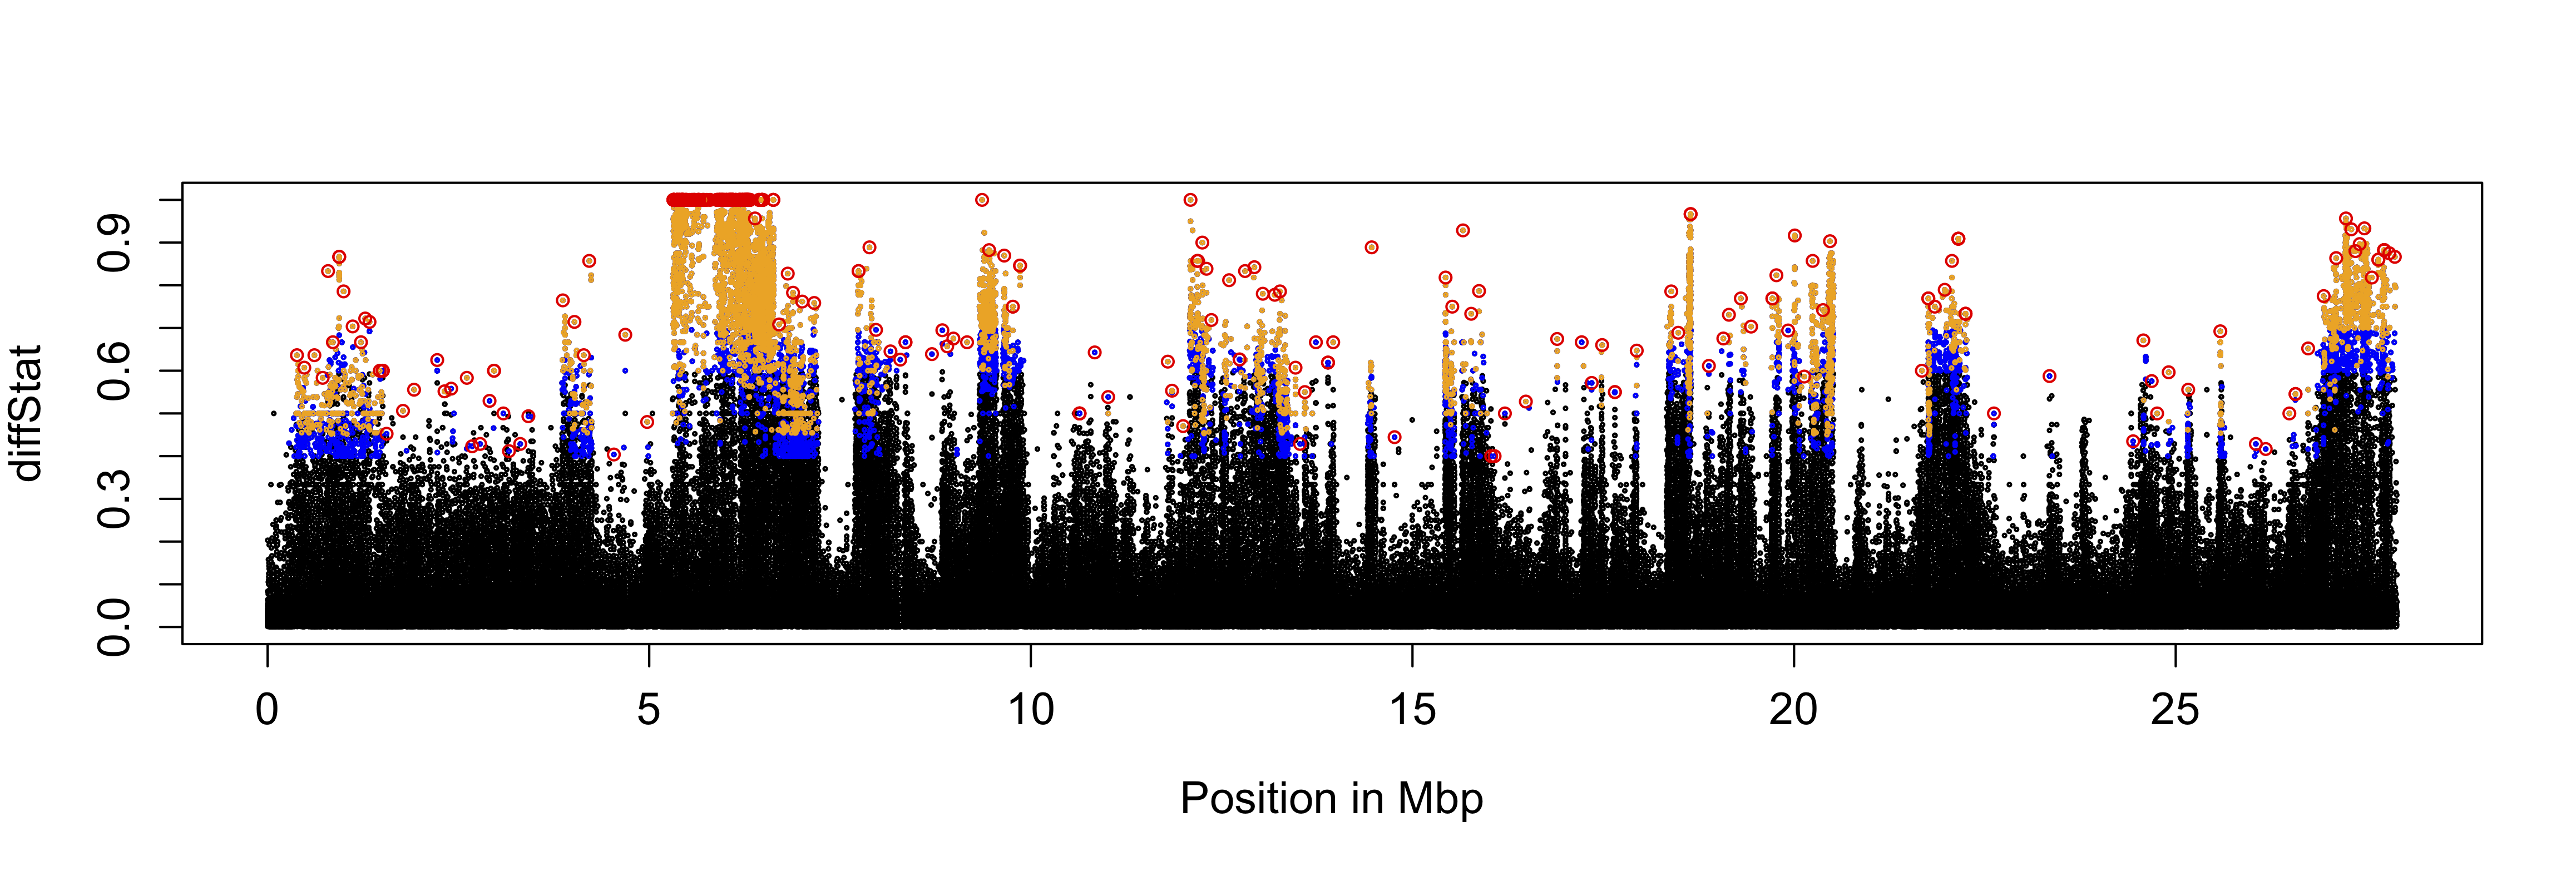


Chr X.


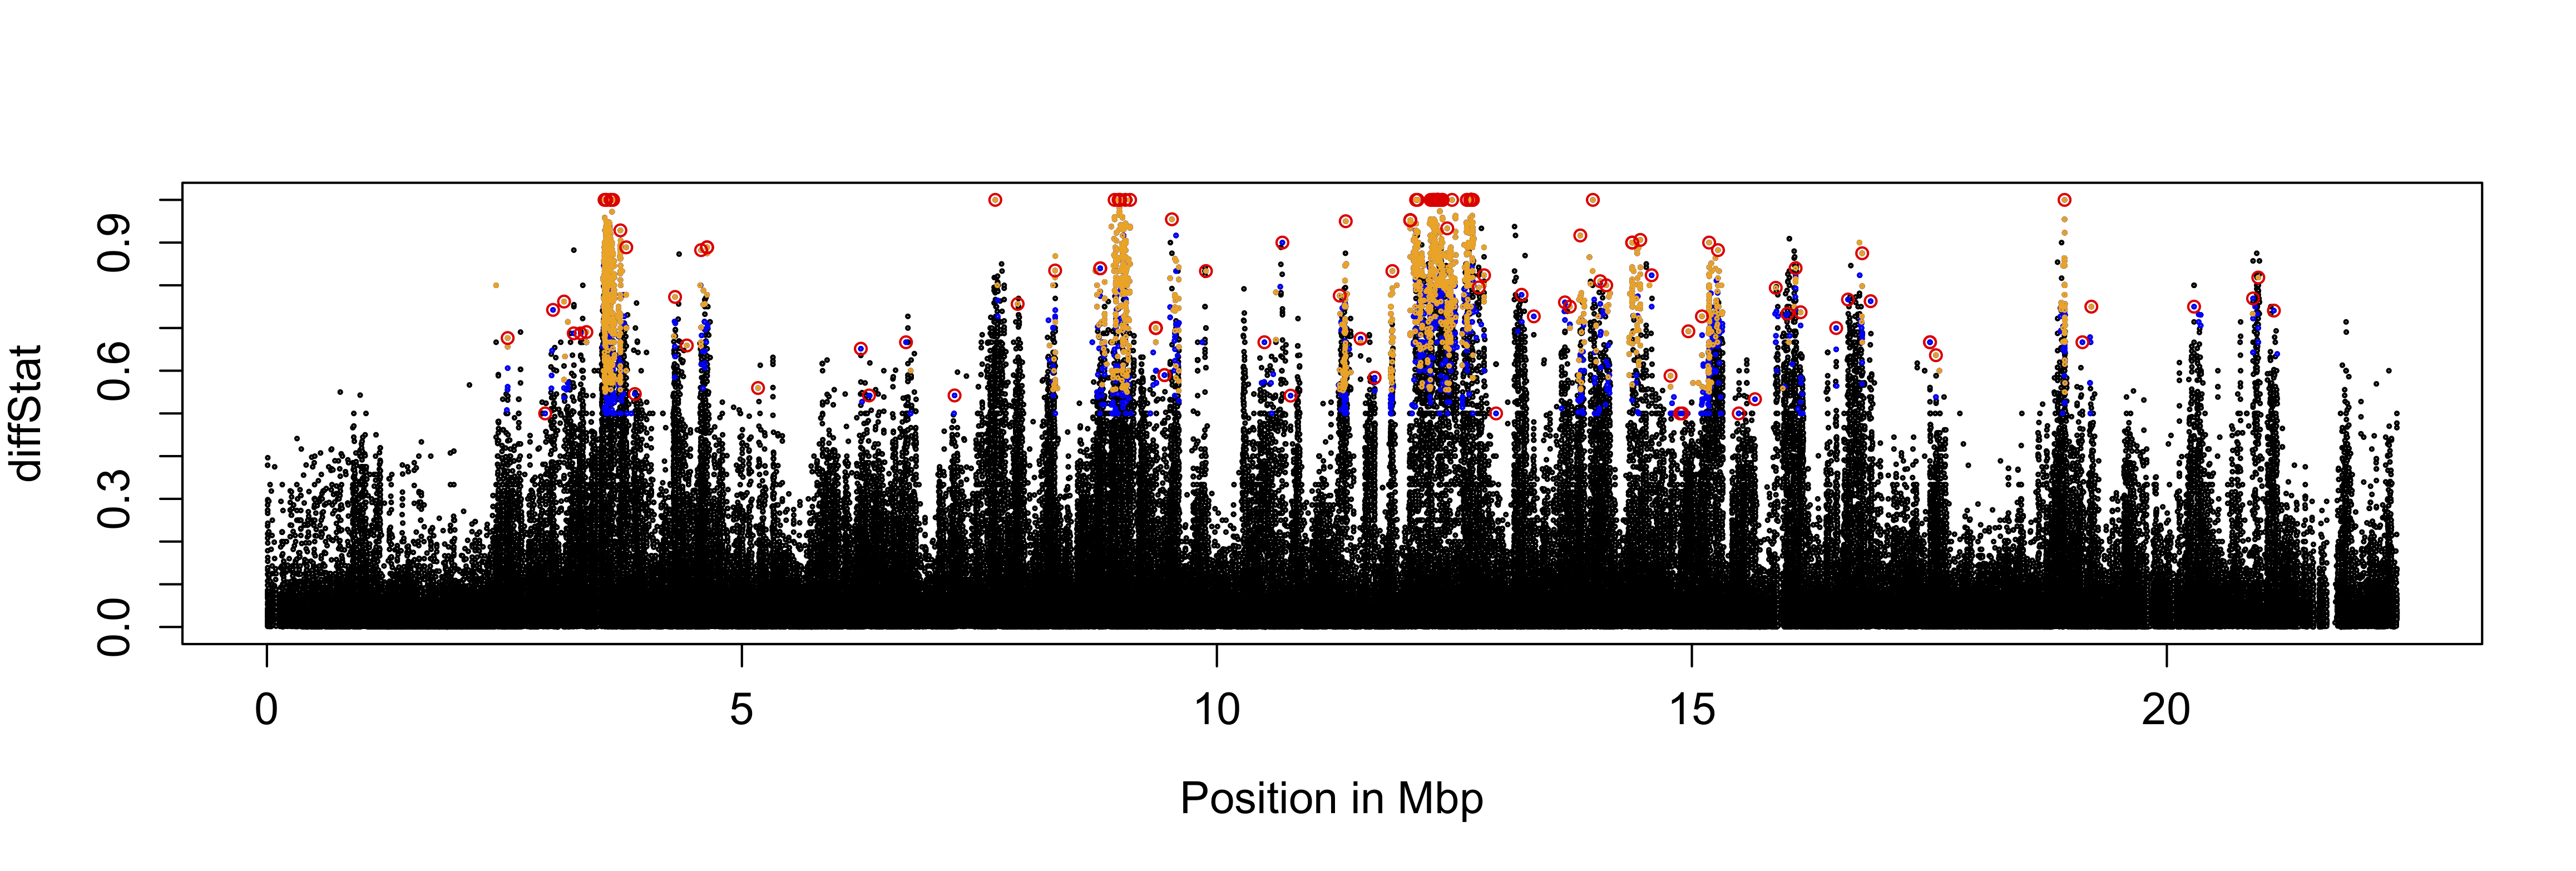

Supplement: S6 (10.1371/journal.pgen.1001336.s006) [file journal.pgen.1001336.s006]

**4A**


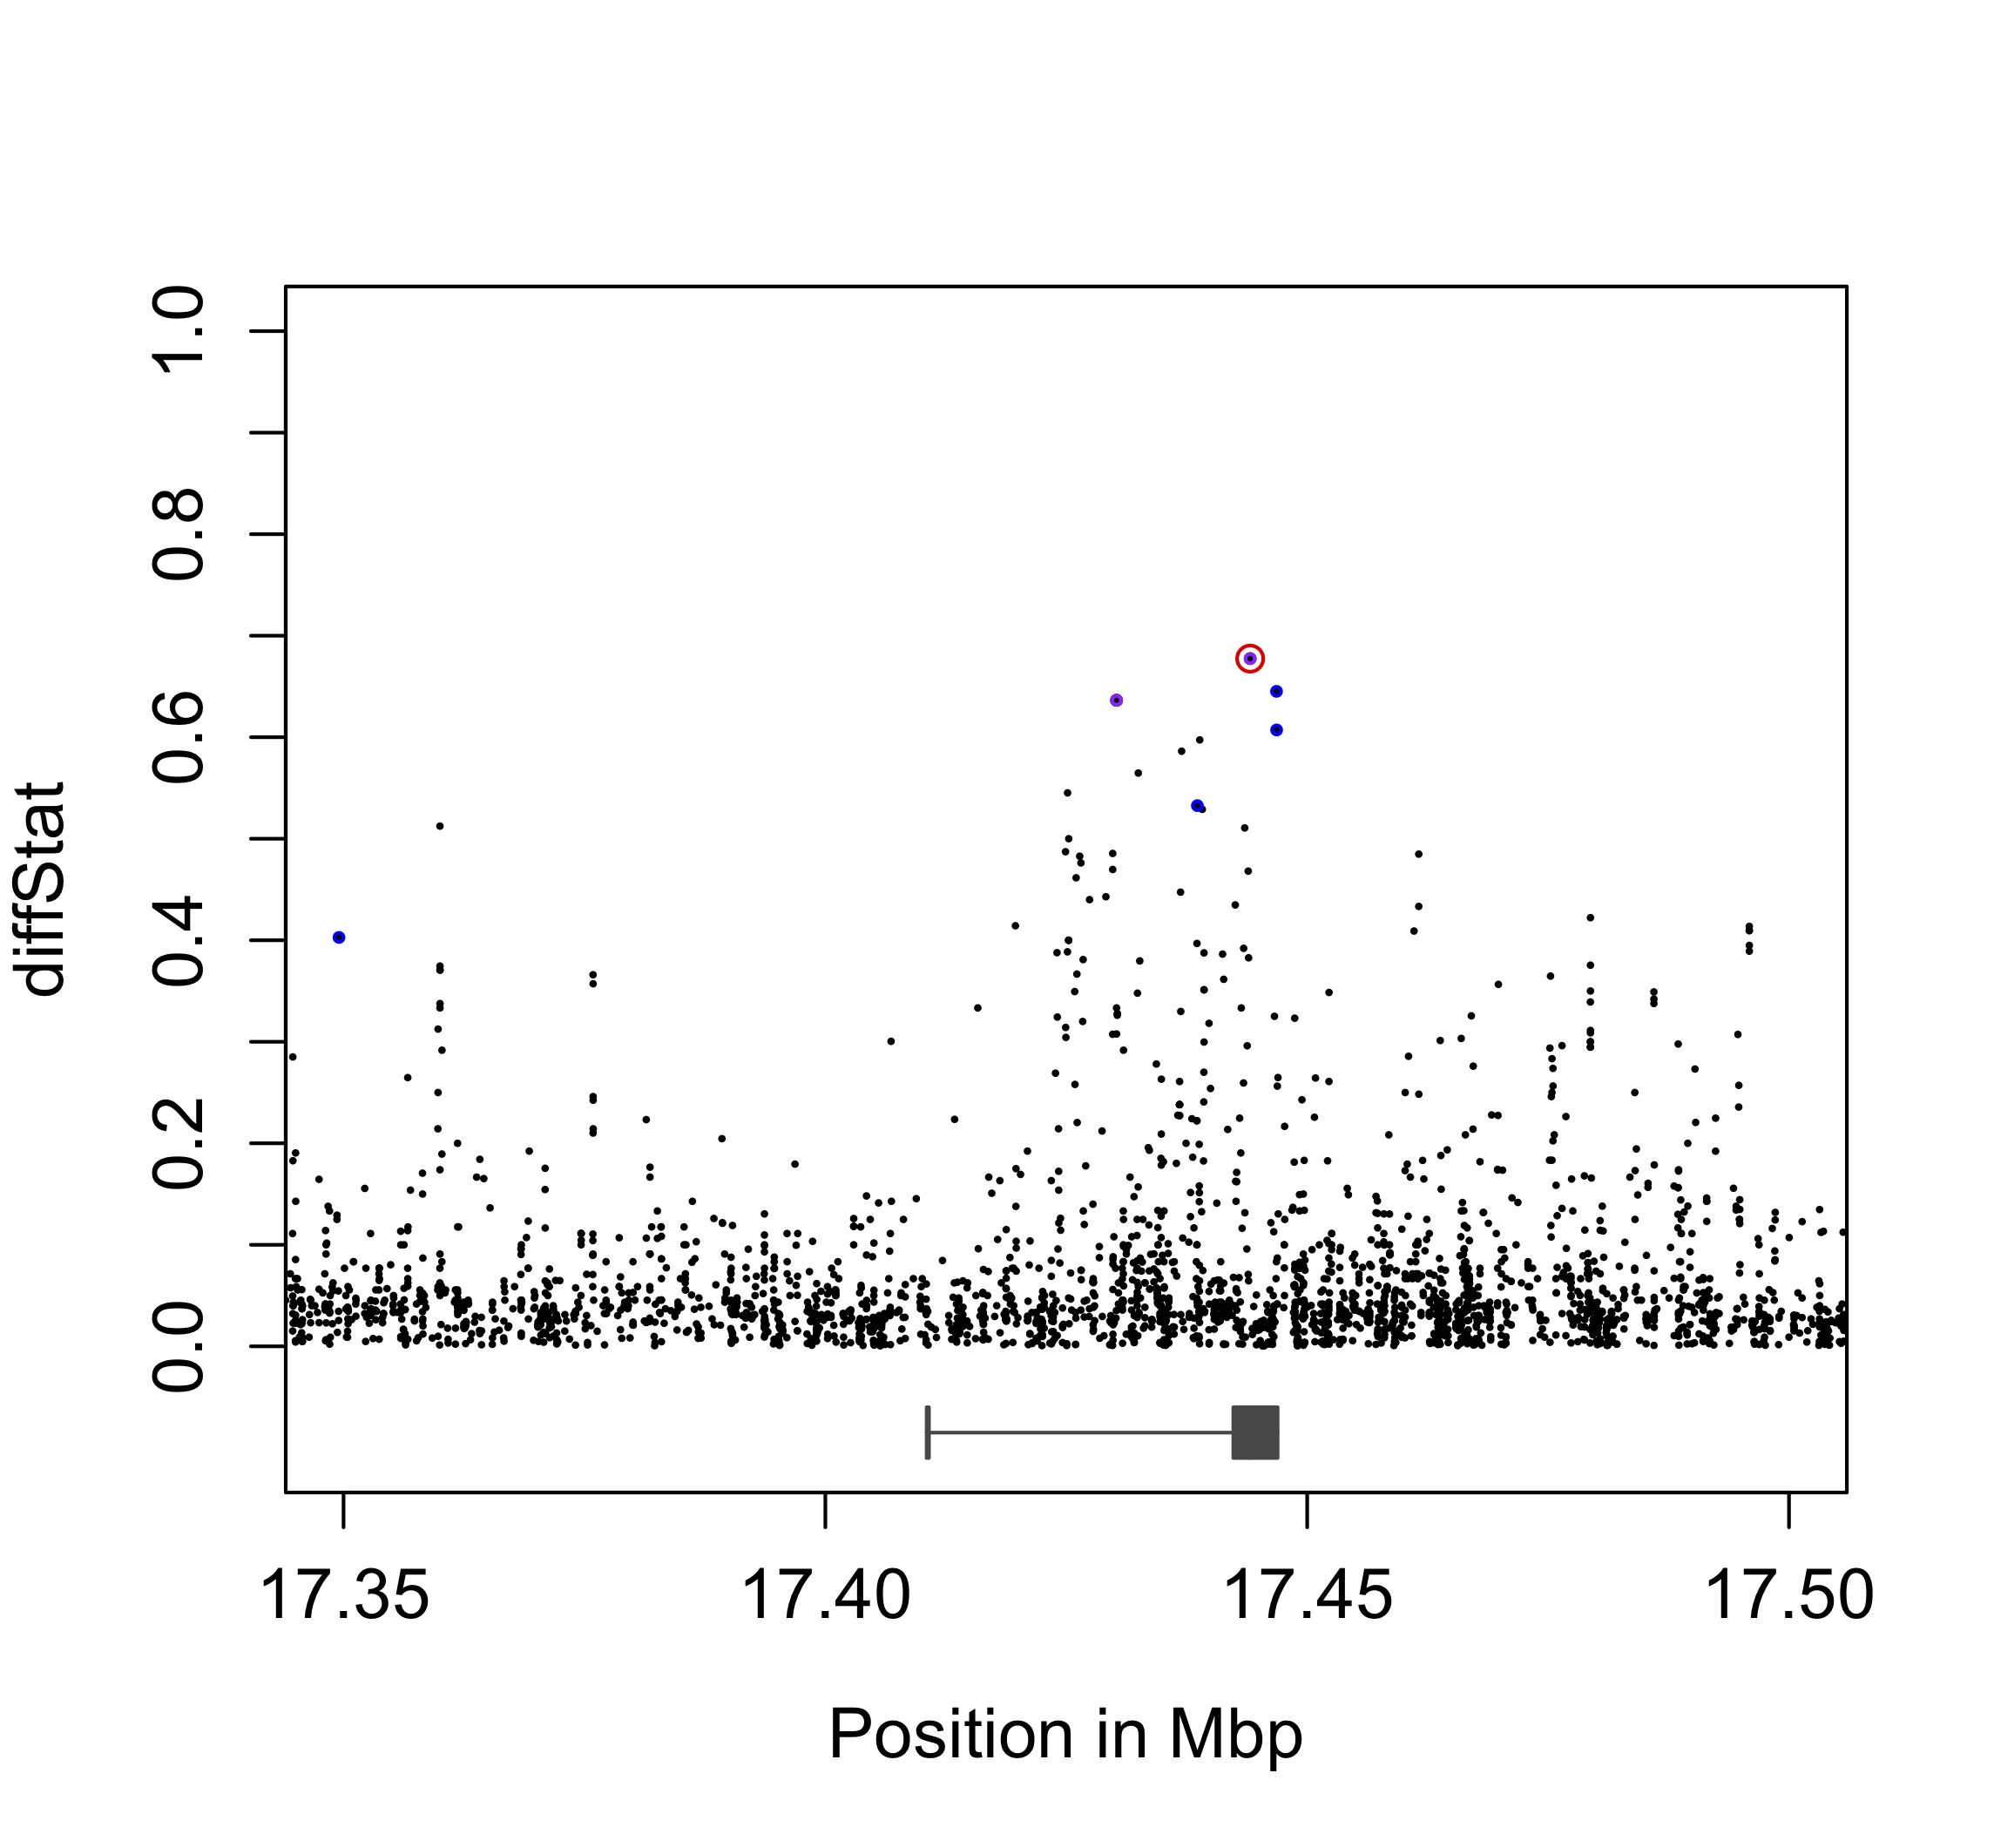


**4B**


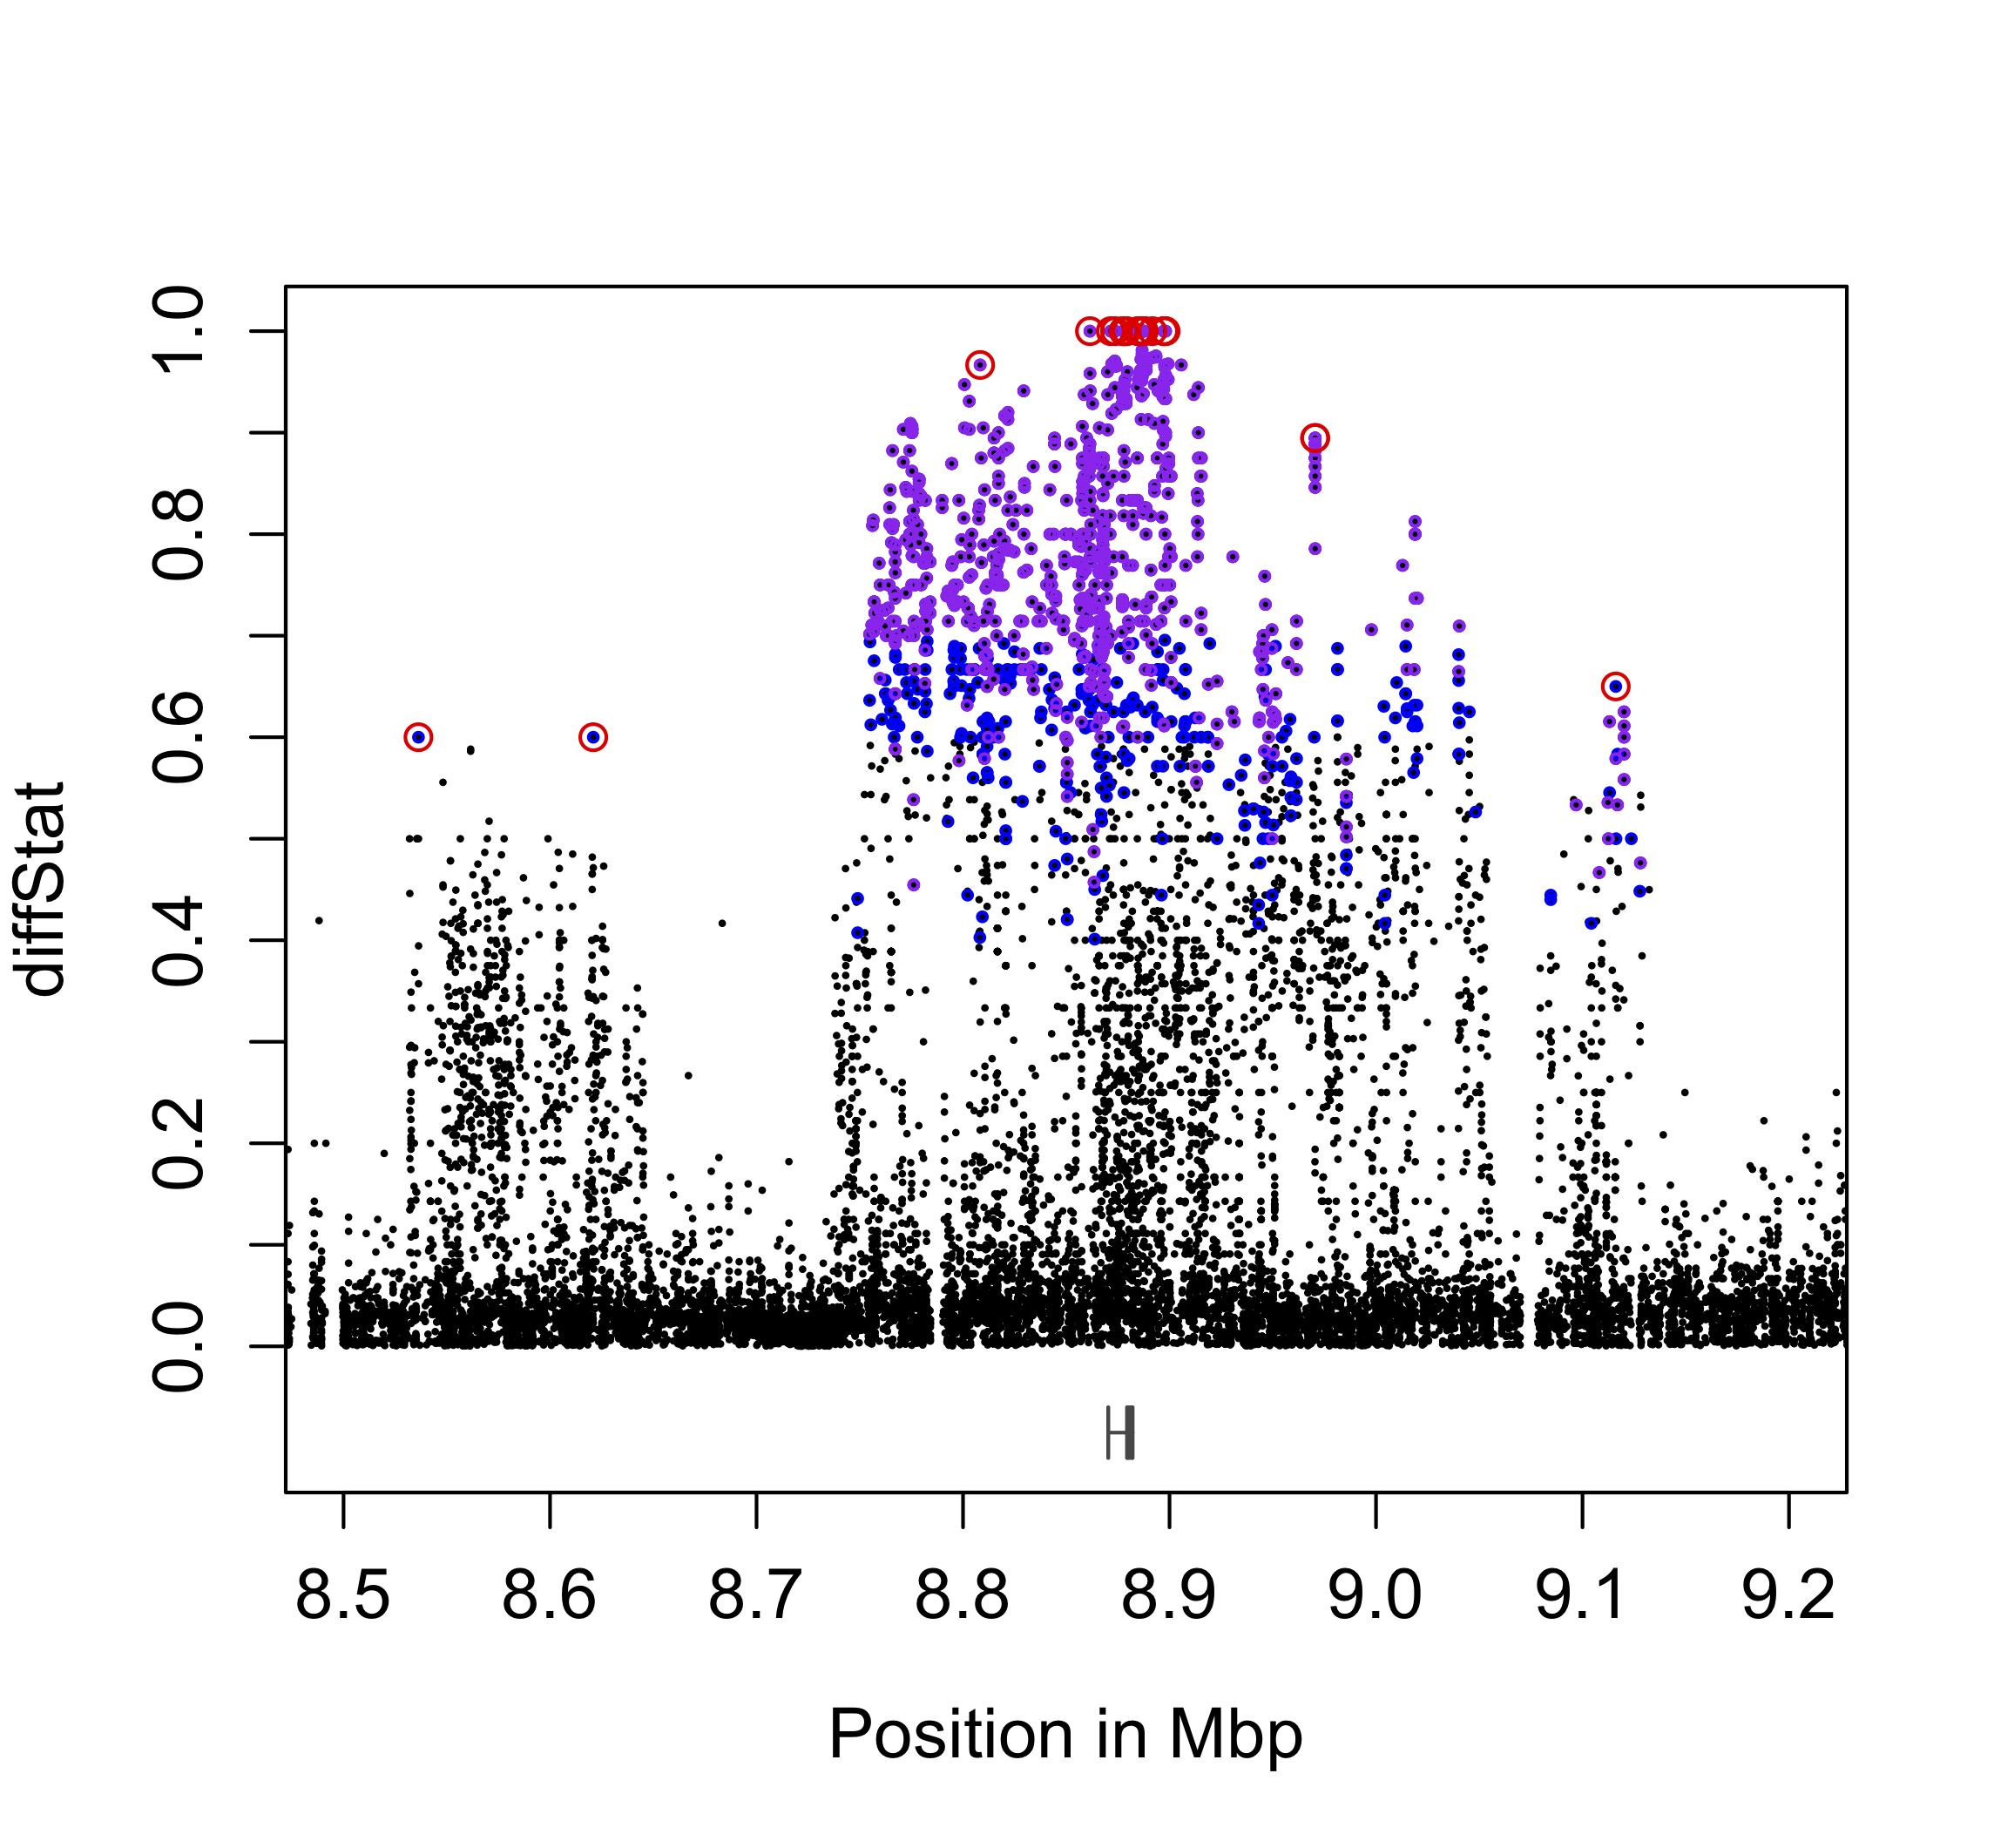

Supplement: S8 (10.1371/journal.pgen.1001336.s008) [file journal.pgen.1001336.s008]
